# Supplementary material for: WRKY33 negatively regulates anthocyanin biosynthesis and cooperates with PHR1 to mediate acclimation to phosphate starvation
Source: PubMed Central journal article supplement — Plant Commun. 2024 Jan 16;5(5):100821. doi: 10.1016/j.xplc.2024.100821 (PMC11121177; doi:10.1016/j.xplc.2024.100821), 2024-01-16
Supplement: mmc1.pdf [file mmc1.pdf]

**Plant Communications, Volume 5**

**Supplemental information**

**WRKY33 negatively regulates anthocyanin biosynthesis and cooperates with PHR1 to mediate acclimation to phosphate starvation**

**Han Tao, Fei Gao, Linying Li, Yuqing He, Xueying Zhang, Mengyu Wang, Jia Wei, Yao Zhao, Chi Zhang, Qiaomei Wang, and Gaojie Hong**

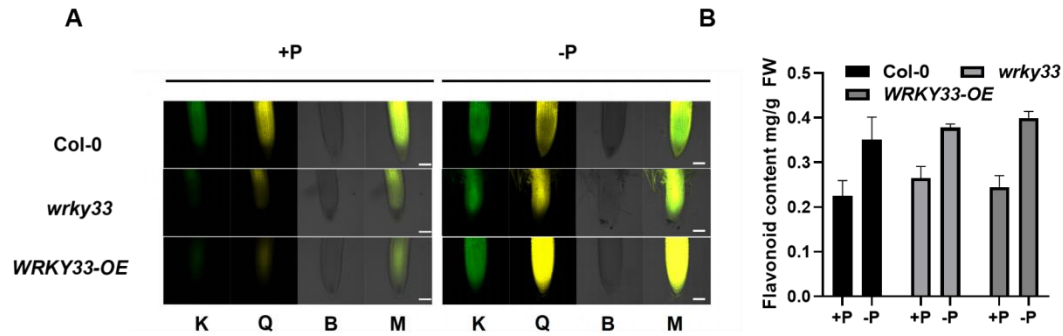

**Supplemental Figure 1. The effects of WRKY33 on flavonoids in *Arabidopsis thaliana***

**(A)** In situ flavonol staining of 9-day-old Col-0, *wrky33* and *WRKY33-OE* seedlings grown on  $\frac{1}{2}$ MS +P (1.25 mM Pi) and -P (0 mM Pi) media. Flavonols in ethanol-bleached inflorescences were stained with diphenylboric acid 2-aminoethylester (DPBA) to saturation and imaged with a Leica TCS SP5 confocal laser-scanning microscope. K: kaempferol; Q: quercetin; B: Bright; M: merged. **(B)** Flavonoids contents of 9-day-old Col-0, *wrky33* and *WRKY33-OE* plants grown under Pi-sufficient and Pi-starvation conditions. Error bars indicate the SD of four biological replicates.

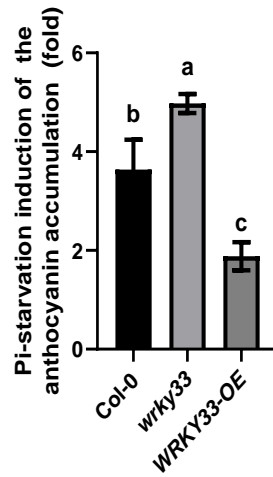

**Supplemental Figure 2. Ratios of the anthocyanin accumulation in -Pi/+Pi conditions**

9-day-old Col-0, *wrky33* and *WRKY33-OE* seedlings grown on  $\frac{1}{2}$ MS +P (1.25 mM Pi) and -P (0 mM Pi) media. Different letters indicate significant differences (ANOVA, Fisher's LSD tests;  $P < 0.05$ ). Error bars indicate the SD of four biological replicates.

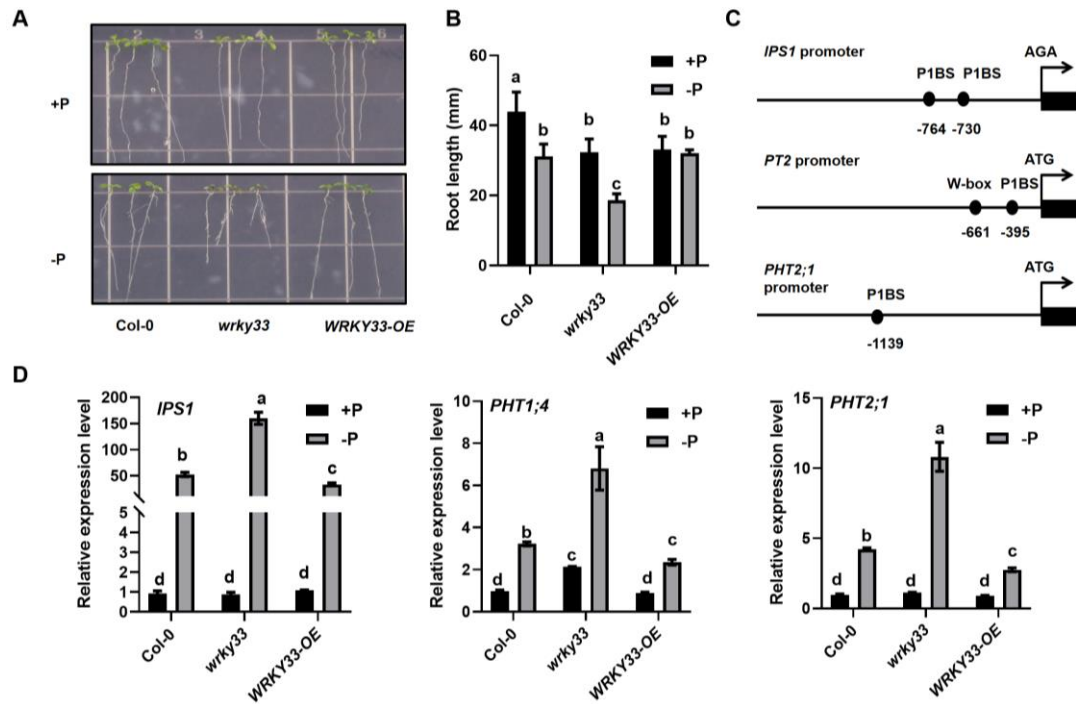

**Supplemental Figure 3. The root growth and relative expression levels of PSI genes in WRKY33-related mutants**

(A) Phenotype of 9-day-old Col-0, *wrky33* and *WRKY33-OE* seedlings grown on +Pi and -Pi media. (B) Root length of Col-0, *wrky33* and *WRKY33-OE* seedlings grown on +Pi and -Pi media for 9 days. Different letters indicate significant differences. (C) The diagram of the presence / absence of W-boxes and / or P1BS elements in the promoters of *IPS1*, *PHT1;4* and *PHT2;1* (D) qRT-PCR analysis of Pi starvation-responsive (PSI) genes expression in *Col-0*, *wrky33* and *WRKY33-OE* grown on +Pi/-Pi media s for 9 days. Error bars indicate the SD of four biological replicates. Different letters above the bars indicate significant differences between groups ( $P < 0.05$ ; ANOVA with Fisher's LSD test).

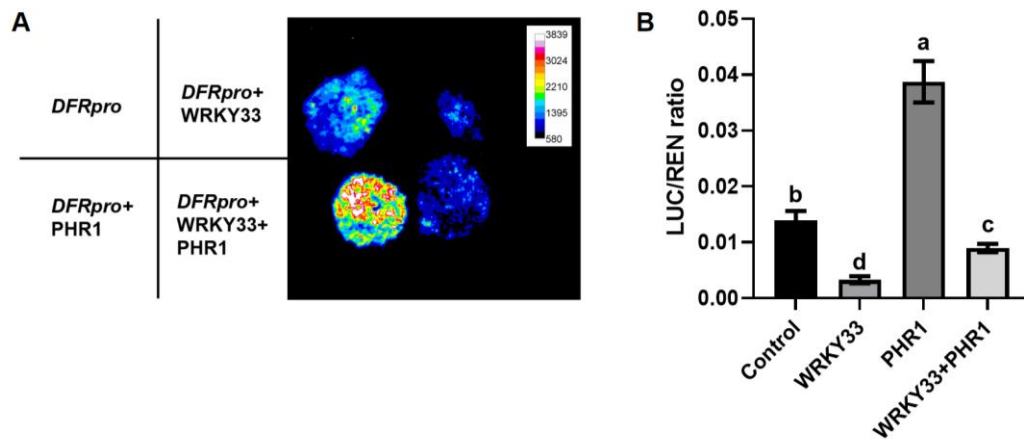

**Supplemental Figure 4. PHR1 suppresses the inhibition of *DFR* promoter by WRKY33**

(A) The transient expression assay showed the inhibition of WRKY33 to *DFR* promoter was compromised when PHR1 coexpressed with WRKY33 in *N. benthamiana* leaves. (B) Relative firefly LUC to REN ratios from transient expression assays. These represent the activity of the *DFR* promoter in the absence/presence of WRKY33 and PHR1. Error bars indicate the SD of four biological replicates. Different letters above the bars indicate significant differences between groups ( $P < 0.05$ ; ANOVA with Fisher's LSD test).

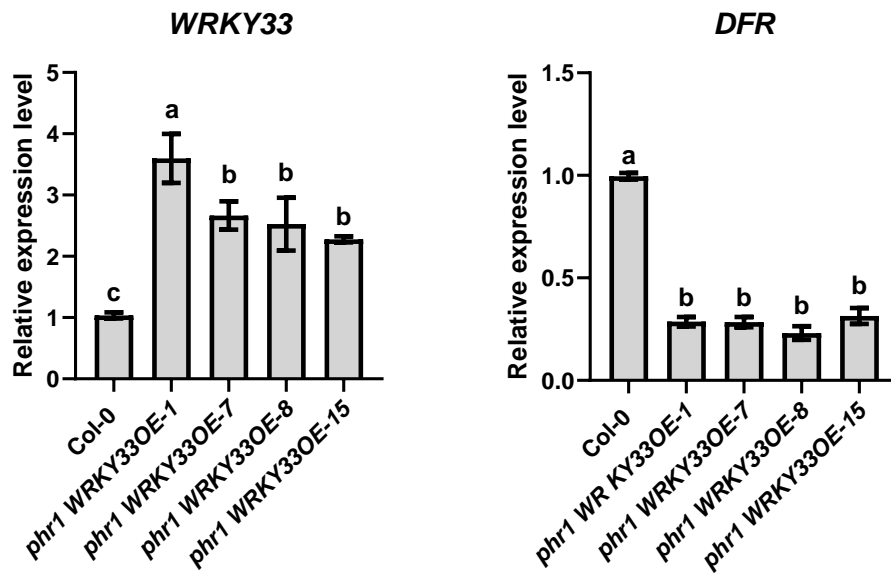

**Supplemental Figure 5. The expression levels of *WRKY33* and *DFR* in *phr1/WRKY33OE* homozygous plants**

Homozygous T3 lines were screened using hygromycin. *phr1WRKY33OE-1*, *phr1WRKY33OE-7*, *phr1WRKY33OE-8*, *phr1WRKY33OE-15* were different homozygous lines. Error bars indicate the SD of three biological replicates. Different letters above the bars indicate significant differences between groups ( $P < 0.05$ ; ANOVA with Fisher's LSD test).

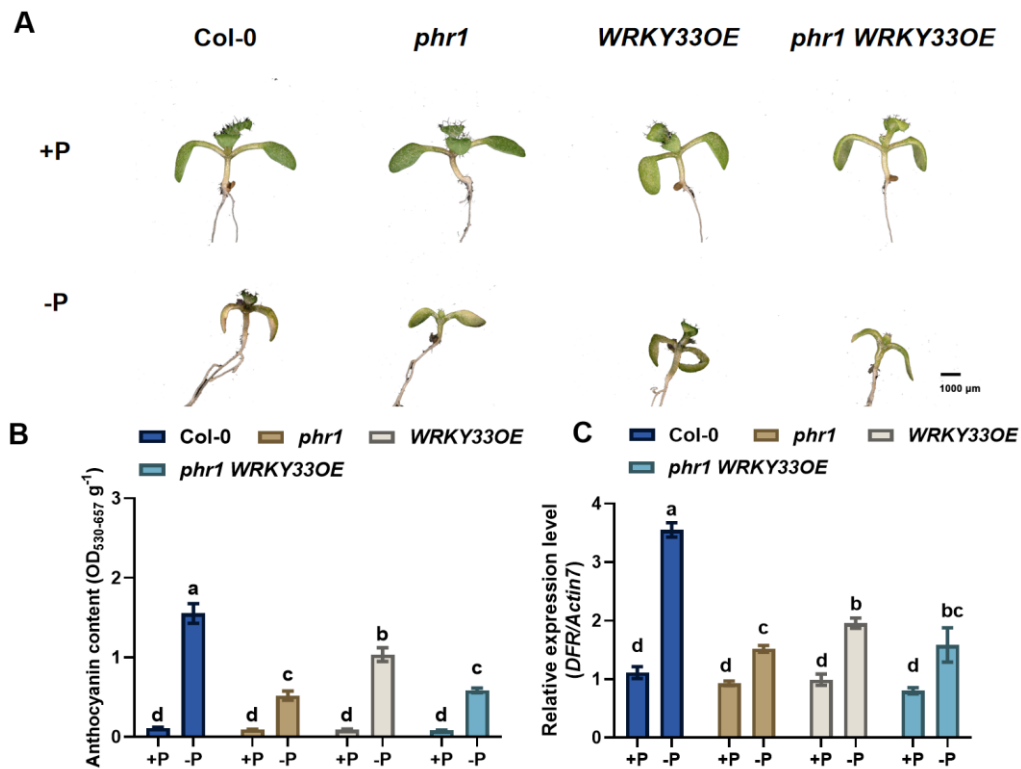

**Supplemental Figure 6. The phenotype of *Col-0*, *phr1*, *WRKY33OE* and *phr1WRKY33OE* under +Pi or -Pi conditions.**

(A) The anthocyanin accumulation and phenotype of *Col-0*, *phr1*, *WRKY33OE* and *phr1WRKY33OE* under +Pi or -Pi conditions. (B-C) The anthocyanin content (B) and relative expression levels of anthocyanin biosynthesis genes *DFR* (C) in *Col-0*, *phr1*, *WRKY33OE* and *phr1WRKY33OE* under +Pi or -Pi conditions. Error bars indicate the SD of three biological replicates. Different letters indicate statistically significant differences ( $P < 0.05$ )

**Supplemental Table 1. Primer sequences in this study**

| Primer names   | Primer sequence (5'--3')                           | Purpose      |
|----------------|----------------------------------------------------|--------------|
| CHS-qRT-F      | GGAGAAGTTCAAGCGCATGTG                              | qRT-PCR      |
| CHS-qRT-R      | ATGTGACGTTTCCGAATTGTCG                             | qRT-PCR      |
| CHI-qRT-F      | CTCTCTTACGGTTGCGTTTTTCG                            | qRT-PCR      |
| CHI-qRT-R      | CACCGTTCTTCCCGATGATAGA                             | qRT-PCR      |
| DFR-qRT-F      | AGCCGCCAAGGGACGTTATATTTG                           | qRT-PCR      |
| DFR-qRT-R      | CCGGGAGAAAACCCTTTTGACGA                            | qRT-PCR      |
| DFR-W1-F       | GTGGTGGTTACCTCGTCCAC                               | qRT-PCR-ChIP |
| DFR-W1-R       | CTACACCAAAGACGCTTGGC                               | qRT-PCR-ChIP |
| DFR-W2-F       | AGTACCAACCGGAGAAGCAC                               | qRT-PCR-ChIP |
| DFR-W2-R       | AAGTCACCCACACGTCTCAC                               | qRT-PCR-ChIP |
| Lic-WRKY33-F   | CgACgACAAgACCgTCACCatgATGGCTGCTTCTT<br>TTCTTACAATG | BiFC         |
| Lic-WRKY33-R   | gAggAgAagAgCCgTCgGGGCATAAACGAATCGA<br>AAAAT        | BiFC         |
| pABAi-DFR-Hin  | AAAATGATGAATTGAAAAGCTTCTCTGACGTC                   | Y1H          |
| dIII-F         | TTACGATAACAACAAATTG                                |              |
| pABAi-DFR-SalI | GAGCACATGCCTCGAGGTCGACTTTTGTGGTTA                  | Y1H          |
| -R             | TATGATAGATTGTGC                                    |              |
| DFR-Prob-1-F   | GTACCGGTGGGTGAAATACGTTGACTTCGATTT<br>GTTTGGTGAGAC  | EMSA         |
| DFR-Prob-1-R   | GTCTCACCAAACAAATCGAAGTCAACGTATTT<br>CACCCACCGGTAC  | EMSA         |
| DFR-Prob-2-F   | GAGAAGAGGTCAGCTTAATTTGACTCTCCTC<br>CAAACAGAGAGAC   | EMSA         |
| DFR-Prob-2-R   | GTCTCTCTGTTTGGAGGAGAGTCAAAATTAAG<br>CTGACCTCTTCTC  | EMSA         |
